# Supplementary material
Source: publisher figshare collection journal article supplement (https://karger.figshare.com/ndownloader/files/10233753)
Supplement: Supplementary file 1 [file 10233753]

**Supplemental Table 1.** Anaphylaxis for patients who experienced a positive cashew OFC result

|  | | 1 | 2 | 3 | 4 | 5 |
| --- | --- | --- | --- | --- | --- | --- |
| Sex | | M | F | M | M | M |
| Age (years) | | 13 | 6 | 5 | 10 | 9 |
| Past history of FA | History of an immediate reaction to cashew nut | - | - | - | - | - |
| Immediate reaction to peanut | + | - | - | - | - |
| Immediate reaction to any nut except cashew nut | - | - | Walnut | - | Mixed nuts |
| Threshold dose at OFC to cashew nut | | 2.5 | 4 | 1.25 | 6.25 | 10 |
| Cashew nut-sIgE (kUA/L) | | 2.44 | 7.45 | 22.7 | 12.6 | 5.26 |
| Clinical signs | | Urticaria  Wheezing  Abdominal pain | Urticaria  Wheezing | Urticaria  Dyspnea  Vomit | Urticaria  Wheezing  Abdominal pain  Activity low | Abdominal pain  Tachycardia  Pale |
| Treatment | | AH  β2  Steroids  Ad | AH  β2  Steroids | AH  β2  Steroids | AH  β2 | AH  Steroids |

OFC, oral food challenge; FA, food allergy; Ad, adrenaline; β2, β2-inhalation; AH, antihistamine; sIgE, specific IgE
